# Supplementary material
Source: PubMed Central journal article supplement (PMC4636977)

**Supplemental Figure 1.** Unadjusted Hazard Ratios for All-Cause Death Associated With Abnormal Cardiac Troponin T ( $\geq 0.01$  ng/mL) in Baseline Demographics, Comorbidities, and Kidney Function Subgroups.

### Forest plot for Death

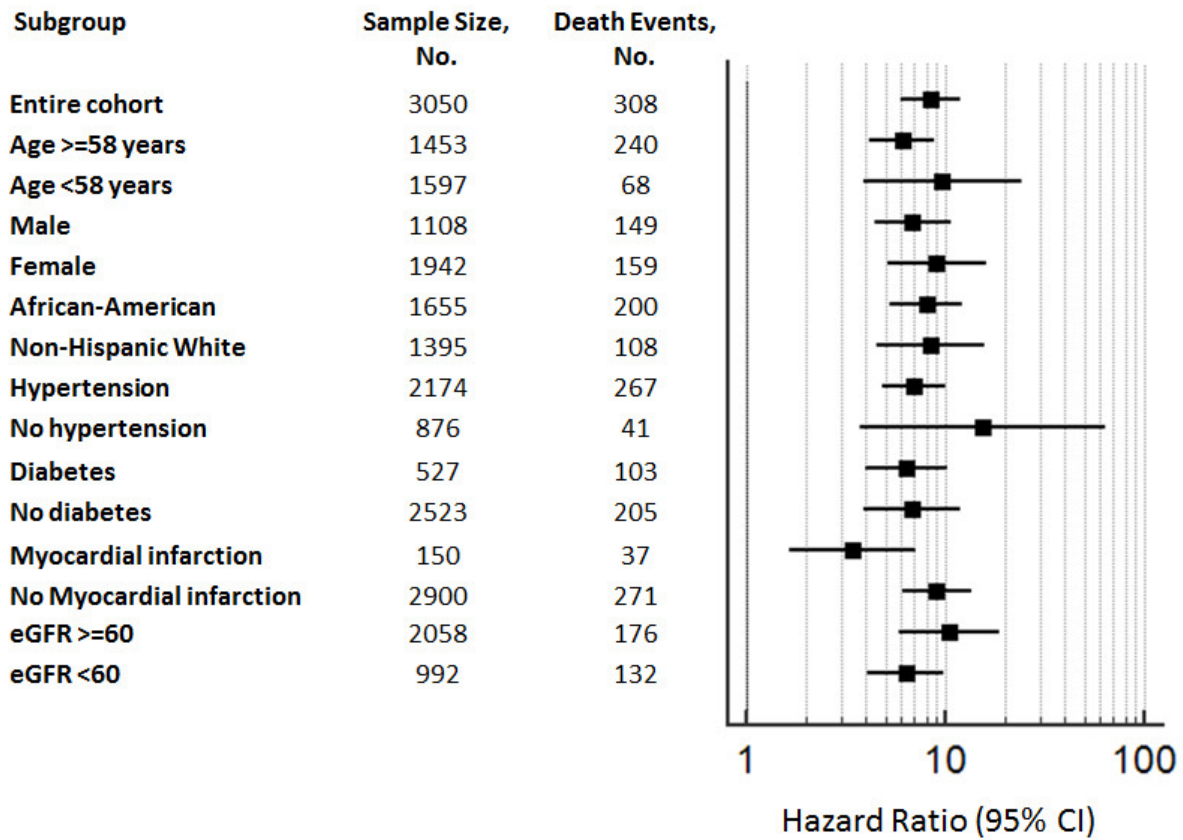

**Supplemental Figure 2.** Unadjusted Hazard Ratios for ESRD Associated With Abnormal Cardiac Troponin T ( $\geq 0.01$  ng/mL) in Baseline Demographics, Comorbidities, and Kidney Function Subgroups<sup>a</sup>.

<sup>a</sup>The subgroup “No hypertension” is not plotted. The “No hypertension” sample size was 876 with only 3 ESRD events (Hazard Ratio 0.0; Confidence interval 0,0).

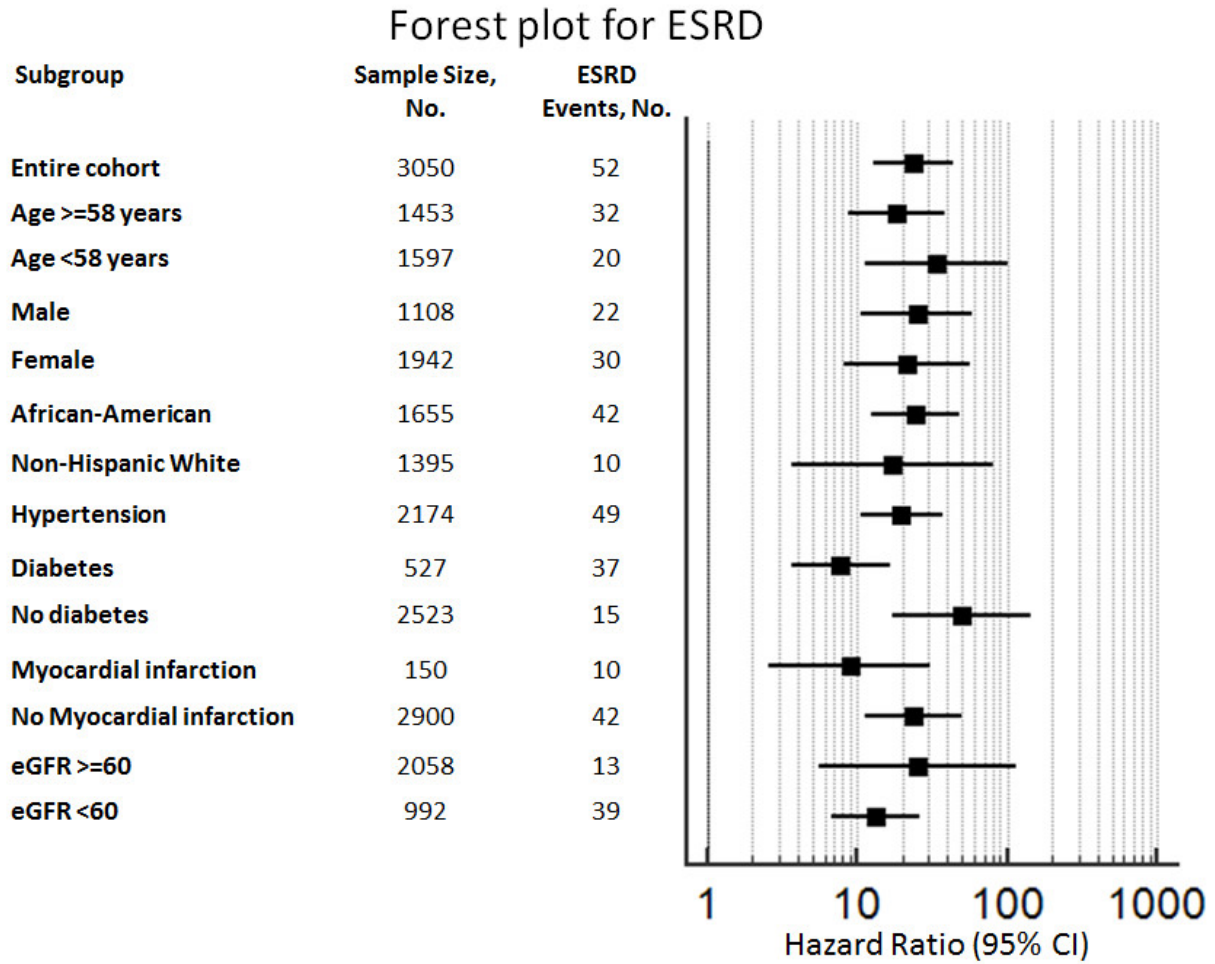

Supplement: NIHMS721150-supplement.pdf [file NIHMS721150-supplement.pdf]
